# Supplementary material for: A randomized phase II trial of erlotinib vs. S-1 as a third- or fourth-line therapy for patients with wild-type EGFR non-small cell lung cancer (HOT1002)
Source: Springer Nature journal article supplement (doi:10.1007/s00280-017-3432-4), 2017-09-13
Supplement: MOESM4 [file 280_2017_3432_MOESM4_ESM.docx]

Supplementary Table1. Previous regimens.

|  | First-line therapy | | Second-line therapy | | Third-line therapy | |
| --- | --- | --- | --- | --- | --- | --- |
| Treatment regimen | Erlotinib | S-1 | Erlotinib | S-1 | Erlotinib | S-1 |
|  | (n = 19) | (n = 18) | (n = 19) | (n = 18) | (n = 3) | (n = 5) |
| Platinum-based doublets | 19 | 17 | 2 | 6 | 0 | 1 |
| Pemetrexed | 11 | 11 | 1 | 4 | 0 | 0 |
| Paclitaxel | 5 | 4 | 0 | 2 | 0 | 0 |
| Gemcitabine | 2 | 0 | 0 | 0 | 0 | 0 |
| Irinotecan | 0 | 1 | 0 | 0 | 0 | 0 |
| Docetaxel | 1 | 1 | 0 | 0 | 0 | 1 |
| Other | 0 | 0 | 1 | 0 | 0 | 0 |
| Single-agent |  |  |  |  |  |  |
| Docetaxel | 0 | 1 | 13 | 11 | 1 | 2 |
| Amurubicin | 0 | 0 | 1 | 1 | 1 | 0 |
| Pemetrexed | 0 | 0 | 3 | 0 | 0 | 2 |
| Vinorelbine | 0 | 0 | 0 | 0 | 1 | 0 |
